# Supplementary material for: miRNA expression profiles in cerebrospinal fluid and blood of patients with Alzheimer’s disease and other types of dementia – an exploratory study
Source: Springer Nature journal article supplement (doi:10.1186/s40035-016-0053-5), 2016-03-15
Supplement: MOESM1 [file 9788558]

**Additional file 1.** Regulation of the 168 most frequently detected miRNAs in blood of patients with dementia

| <b>miRNA</b> | <b>N<sub>AD</sub></b> | <b>N<sub>control</sub></b> | <b>M<sub>AD</sub> (range)</b> | <b>M<sub>control</sub> (range)</b> | <b>FC</b> | <b>p</b> |
|--------------|-----------------------|----------------------------|-------------------------------|------------------------------------|-----------|----------|
| miR-590-5p   | 10                    | 10                         | 1.19 (0.83-1.88)              | 0.88 (0.52-1.03)                   | 1.35      | 0.002    |
| miR-194-5p   | 9                     | 10                         | 0.74 (0.49-1.32)              | 1.36 (0.48-2.62)                   | 0.54      | 0.028    |
| miR-142-5p   | 10                    | 10                         | 1.13 (0.37-2.08)              | 0.92 (0.43-1.66)                   | 1.22      | 0.043    |
| miR-30e-5p   | 10                    | 10                         | 0.91 (0.82-1.19)              | 1.06 (0.85-1.28)                   | 0.85      | n.s.     |
| miR-425-3p   | 10                    | 9                          | 0.85 (0.35-1.62)              | 1.20 (0.51-1.79)                   | 0.70      | n.s.     |
| miR-338-3p   | 10                    | 10                         | 1.21 (0.51-2.30)              | 0.71 (0.45-1.63)                   | 1.71      | n.s.     |
| let-7f-5p    | 10                    | 10                         | 1.07 (0.28-1.51)              | 1.27 (0.72-2.11)                   | 0.83      | n.s.     |
| miR-18b-5p   | 10                    | 10                         | 1.10 (0.85-1.74)              | 0.95 (0.62-1.20)                   | 1.14      | n.s.     |
| miR-186-5p   | 10                    | 10                         | 0.84 (0.32-1.53)              | 1.19 (0.57-2.36)                   | 0.71      | n.s.     |
| miR-107      | 10                    | 10                         | 0.95 (0.47-1.21)              | 1.09 (0.88-1.42)                   | 0.87      | n.s.     |
| let-7c-5p    | 10                    | 10                         | 0.97 (0.28-1.40)              | 1.15 (0.72-1.94)                   | 0.84      | n.s.     |
| miR-27a-3p   | 10                    | 10                         | 1.09 (0.55-1.77)              | 0.88 (0.63-1.30)                   | 1.24      | n.s.     |
| miR-377-3p   | 9                     | 10                         | 1.18 (0.29-3.77)              | 0.72 (0.16-1.88)                   | 1.63      | n.s.     |
| miR-139-5p   | 10                    | 10                         | 1.27 (0.28-2.42)              | 0.90 (0.33-1.58)                   | 1.40      | n.s.     |
| miR-628-3p   | 9                     | 9                          | 0.97 (0.30-2.89)              | 0.51 (0.34-1.28)                   | 1.89      | n.s.     |
| miR-181a-5p  | 10                    | 10                         | 0.81 (0.61-1.26)              | 1.03 (0.66-2.30)                   | 0.78      | n.s.     |
| miR-486-5p   | 10                    | 10                         | 1.00 (0.37-1.37)              | 1.40 (0.48-2.18)                   | 0.71      | n.s.     |
| miR-505-3p   | 9                     | 9                          | 0.70 (0.37-1.02)              | 0.84 (0.58-1.49)                   | 0.82      | n.s.     |
| miR-215-5p   | 9                     | 9                          | 0.61 (0.39-1.16)              | 0.99 (0.37-2.07)                   | 0.61      | n.s.     |
| miR-766-3p   | 9                     | 10                         | 0.94 (0.64-1.30)              | 0.87 (0.48-1.03)                   | 1.07      | n.s.     |
| miR-345-5p   | 10                    | 10                         | 1.01 (0.63-2.64)              | 0.88 (0.54-1.45)                   | 1.15      | n.s.     |
| miR-28-5p    | 9                     | 10                         | 0.99 (0.59-1.37)              | 0.78 (0.44-1.51)                   | 1.27      | n.s.     |
| miR-545-3p   | 9                     | 10                         | 1.02 (0.55-4.93)              | 0.58 (0.31-2.49)                   | 1.77      | n.s.     |
| miR-155-5p   | 9                     | 10                         | 0.71 (0.37-1.50)              | 0.88 (0.44-2.16)                   | 0.80      | n.s.     |
| miR-15b-5p   | 10                    | 10                         | 0.90 (0.25-1.93)              | 1.15 (0.42-2.01)                   | 0.77      | n.s.     |
| miR-660-5p   | 10                    | 10                         | 1.12 (0.53-2.02)              | 1.02 (0.52-1.29)                   | 1.09      | n.s.     |
| miR-629-5p   | 9                     | 10                         | 0.74 (0.32-1.72)              | 0.80 (0.54-2.94)                   | 0.92      | n.s.     |
| let-7a-5p    | 10                    | 10                         | 0.98 (0.52-1.37)              | 0.97 (0.78-2.03)                   | 1.01      | n.s.     |
| miR-98-5p    | 10                    | 10                         | 0.89 (0.26-1.48)              | 1.06 (0.73-2.42)                   | 0.83      | n.s.     |
| miR-183-5p   | 10                    | 10                         | 1.44 (0.31-4.81)              | 0.95 (0.31-2.53)                   | 1.50      | n.s.     |
| miR-151a-3p  | 10                    | 10                         | 0.98 (0.49-1.29)              | 1.14 (0.74-1.47)                   | 0.85      | n.s.     |
| let-7b-5p    | 10                    | 10                         | 0.80 (0.49-2.02)              | 1.23 (0.59-2.44)                   | 0.65      | n.s.     |
| miR-885-5p   | 10                    | 9                          | 0.85 (0.28-2.05)              | 1.06 (0.06-5.20)                   | 0.79      | n.s.     |
| let-7i-5p    | 10                    | 10                         | 0.83 (0.56-1.88)              | 1.13 (0.60-1.97)                   | 0.73      | n.s.     |
| miR-199a-5p  | 10                    | 10                         | 1.44 (0.35-2.06)              | 0.93 (0.46-1.61)                   | 1.54      | n.s.     |

|             |    |    |                  |                  |      |      |
|-------------|----|----|------------------|------------------|------|------|
| miR-130b-3p | 10 | 10 | 1.05 (0.72-1.52) | 0.89 (0.63-1.43) | 1.16 | n.s. |
| miR-148a-3p | 10 | 10 | 1.03 (0.50-1.18) | 0.99 (0.64-1.78) | 1.04 | n.s. |
| miR-15a-5p  | 10 | 10 | 0.74 (0.36-1.98) | 1.15 (0.62-2.18) | 0.64 | n.s. |
| miR-26b-5p  | 10 | 10 | 1.05 (0.29-1.74) | 1.12 (0.73-1.71) | 0.93 | n.s. |
| miR-197-3p  | 9  | 10 | 0.96 (0.62-1.07) | 0.84 (0.54-1.14) | 1.13 | n.s. |
| miR-122-5p  | 10 | 10 | 1.15 (0.24-2.72) | 1.15 (0.09-6.21) | 0.99 | n.s. |
| miR-21-5p   | 10 | 10 | 1.02 (0.68-1.28) | 1.01 (0.74-1.54) | 1.00 | n.s. |
| let-7d-5p   | 10 | 10 | 0.99 (0.51-1.41) | 1.02 (0.73-1.75) | 0.96 | n.s. |
| miR-152-3p  | 9  | 10 | 0.86 (0.48-1.14) | 0.91 (0.51-1.79) | 0.94 | n.s. |
| miR-337-5p  | 9  | 9  | 0.83 (0.34-2.77) | 0.81 (0.20-2.21) | 1.02 | n.s. |
| miR-18a-5p  | 10 | 10 | 1.01 (0.67-1.97) | 0.96 (0.68-1.21) | 1.06 | n.s. |
| miR-424-5p  | 10 | 10 | 1.04 (0.23-2.90) | 1.02 (0.23-1.74) | 1.01 | n.s. |
| miR-375     | 9  | 9  | 0.77 (0.38-1.66) | 0.68 (0.33-3.29) | 1.13 | n.s. |
| miR-497-5p  | 10 | 10 | 1.03 (0.64-2.38) | 0.97 (0.30-1.95) | 1.05 | n.s. |
| miR-223-3p  | 10 | 10 | 1.05 (0.69-1.62) | 1.01 (0.59-1.31) | 1.03 | n.s. |
| miR-106a-5p | 10 | 10 | 1.04 (0.74-1.63) | 0.90 (0.66-1.42) | 1.16 | n.s. |
| miR-210-3p  | 10 | 10 | 1.05 (0.62-1.74) | 0.96 (0.58-1.54) | 1.08 | n.s. |
| miR-382-5p  | 10 | 10 | 1.08 (0.57-5.44) | 0.76 (0.22-2.50) | 1.42 | n.s. |
| miR-92a-3p  | 10 | 10 | 0.99 (0.45-1.79) | 1.17 (0.61-1.87) | 0.84 | n.s. |
| miR-27b-3p  | 10 | 10 | 0.99 (0.79-1.96) | 0.88 (0.47-1.45) | 1.11 | n.s. |
| miR-192-5p  | 10 | 10 | 0.88 (0.57-2.22) | 1.27 (0.32-2.56) | 0.69 | n.s. |
| miR-146b-5p | 9  | 10 | 0.80 (0.28-1.56) | 1.03 (0.31-1.37) | 0.77 | n.s. |
| miR-19b-3p  | 10 | 10 | 1.03 (0.82-1.51) | 0.95 (0.65-1.34) | 1.08 | n.s. |
| miR-30d-5p  | 10 | 10 | 1.03 (0.87-1.40) | 0.93 (0.82-1.18) | 1.10 | n.s. |
| miR-423-5p  | 10 | 10 | 0.94 (0.43-1.75) | 1.06 (0.60-2.20) | 0.88 | n.s. |
| miR-1       | 9  | 9  | 0.99 (0.24-2.70) | 0.93 (0.19-5.69) | 1.06 | n.s. |
| miR-17-5p   | 10 | 10 | 0.99 (0.50-1.42) | 1.20 (0.40-1.66) | 0.82 | n.s. |
| miR-323a-3p | 9  | 10 | 0.89 (0.20-4.43) | 0.87 (0.19-3.27) | 1.02 | n.s. |
| miR-222-3p  | 10 | 10 | 0.97 (0.67-1.24) | 1.07 (0.74-1.41) | 0.90 | n.s. |
| miR-19a-3p  | 10 | 10 | 1.04 (0.72-1.43) | 1.01 (0.55-1.33) | 1.02 | n.s. |
| miR-101-3p  | 10 | 10 | 1.06 (0.69-1.65) | 0.88 (0.62-1.52) | 1.19 | n.s. |
| miR-130a-3p | 10 | 10 | 1.07 (0.69-1.39) | 0.88 (0.61-1.65) | 1.20 | n.s. |
| miR-409-3p  | 10 | 10 | 1.18 (0.38-1.48) | 0.93 (0.16-3.87) | 1.26 | n.s. |
| miR-598-3p  | 9  | 10 | 0.86 (0.53-3.21) | 0.82 (0.49-1.97) | 1.04 | n.s. |
| miR-199a-3p | 10 | 10 | 0.98 (0.80-1.19) | 1.03 (0.68-1.57) | 0.94 | n.s. |
| miR-96-5p   | 9  | 10 | 0.77 (0.10-4.59) | 1.56 (0.18-3.07) | 0.49 | n.s. |
| miR-25-3p   | 10 | 10 | 1.01 (0.38-1.54) | 1.14 (0.52-1.88) | 0.88 | n.s. |
| miR-484     | 10 | 10 | 1.00 (0.86-1.27) | 0.94 (0.71-1.51) | 1.06 | n.s. |
| miR-20b-5p  | 9  | 10 | 0.55 (0.36-2.61) | 1.13 (0.32-2.22) | 0.49 | n.s. |

|             |    |    |                  |                  |      |      |
|-------------|----|----|------------------|------------------|------|------|
| miR-376c-3p | 9  | 10 | 1.18 (0.34-2.23) | 0.87 (0.23-3.01) | 1.35 | n.s. |
| miR-335-5p  | 10 | 10 | 0.90 (0.50-2.25) | 1.04 (0.34-1.69) | 0.86 | n.s. |
| miR-495-3p  | 10 | 10 | 1.11 (0.26-1.54) | 1.02 (0.37-2.62) | 1.08 | n.s. |
| miR-195-5p  | 9  | 10 | 1.02 (0.56-1.54) | 0.89 (0.29-1.48) | 1.14 | n.s. |
| miR-326     | 9  | 10 | 0.88 (0.34-1.61) | 0.89 (0.32-1.55) | 0.98 | n.s. |
| miR-146a-5p | 10 | 10 | 1.04 (0.61-1.36) | 0.94 (0.63-1.48) | 1.10 | n.s. |
| miR-143-3p  | 10 | 10 | 1.42 (0.38-1.77) | 1.07 (0.40-1.61) | 1.33 | n.s. |
| miR-193b-3p | 9  | 10 | 0.83 (0.14-3.30) | 0.70 (0.16-8.74) | 1.17 | n.s. |
| miR-133b    | 9  | 10 | 1.09 (0.32-4.01) | 0.86 (0.07-3.15) | 1.25 | n.s. |
| miR-331-3p  | 10 | 10 | 1.23 (0.33-1.74) | 0.98 (0.58-1.90) | 1.24 | n.s. |
| miR-106b-5p | 10 | 10 | 1.08 (0.86-1.54) | 0.92 (0.45-2.08) | 1.17 | n.s. |
| miR-99b-5p  | 10 | 10 | 1.03 (0.60-1.57) | 1.03 (0.36-2.22) | 0.99 | n.s. |
| miR-30c-5p  | 10 | 10 | 1.04 (0.42-1.64) | 0.96 (0.83-1.97) | 1.07 | n.s. |
| miR-625-3p  | 9  | 10 | 0.74 (0.27-1.98) | 0.89 (0.45-2.46) | 0.83 | n.s. |
| miR-100-5p  | 9  | 10 | 0.83 (0.27-1.55) | 0.74 (0.56-2.15) | 1.11 | n.s. |
| miR-10a-5p  | 9  | 9  | 0.94 (0.38-1.85) | 0.84 (0.37-1.23) | 1.12 | n.s. |
| miR-30a-5p  | 9  | 10 | 1.04 (0.46-1.22) | 0.87 (0.34-1.95) | 1.19 | n.s. |
| miR-425-5p  | 10 | 10 | 1.00 (0.46-1.34) | 1.02 (0.79-1.41) | 0.98 | n.s. |
| miR-454-3p  | 9  | 10 | 0.85 (0.41-1.37) | 0.91 (0.35-1.97) | 0.92 | n.s. |
| miR-539-5p  | 9  | 9  | 0.57 (0.28-4.13) | 1.01 (0.16-4.58) | 0.56 | n.s. |
| miR-33a-5p  | 10 | 10 | 1.15 (0.60-1.69) | 0.99 (0.23-2.31) | 1.16 | n.s. |
| miR-132-3p  | 10 | 10 | 1.13 (0.57-1.64) | 0.94 (0.58-1.95) | 1.19 | n.s. |
| miR-324-3p  | 10 | 10 | 1.12 (0.67-1.31) | 0.97 (0.76-1.40) | 1.15 | n.s. |
| miR-200a-3p | 9  | 9  | 0.60 (0.38-5.46) | 1.22 (0.20-3.45) | 0.49 | n.s. |
| miR-99a-5p  | 10 | 10 | 0.86 (0.54-1.99) | 1.08 (0.46-2.50) | 0.79 | n.s. |
| miR-125b-5p | 10 | 10 | 0.92 (0.51-2.77) | 1.02 (0.16-2.02) | 0.91 | n.s. |
| let-7g-5p   | 10 | 10 | 0.94 (0.63-1.65) | 1.03 (0.60-1.54) | 0.91 | n.s. |
| miR-29a-3p  | 10 | 10 | 0.99 (0.60-1.65) | 0.87 (0.65-1.77) | 1.13 | n.s. |
| miR-376a-3p | 9  | 10 | 0.99 (0.30-3.26) | 1.18 (0.33-3.43) | 0.83 | n.s. |
| miR-22-5p   | 10 | 10 | 0.83 (0.67-1.84) | 1.12 (0.65-1.36) | 0.74 | n.s. |
| miR-191-5p  | 10 | 10 | 1.04 (0.49-1.54) | 1.04 (0.62-1.41) | 0.99 | n.s. |
| miR-141-3p  | 9  | 9  | 0.97 (0.53-2.02) | 0.53 (0.23-2.83) | 1.82 | n.s. |
| miR-376b-3p | 9  | 10 | 1.01 (0.36-2.18) | 0.91 (0.20-2.45) | 1.11 | n.s. |
| miR-196b-5p | 9  | 9  | 0.82 (0.16-1.48) | 0.84 (0.30-1.68) | 0.97 | n.s. |
| miR-150-5p  | 10 | 10 | 1.14 (0.41-2.10) | 1.20 (0.21-2.13) | 0.94 | n.s. |
| miR-142-3p  | 10 | 10 | 0.89 (0.63-2.20) | 0.87 (0.61-1.67) | 1.02 | n.s. |
| miR-23a-3p  | 10 | 10 | 0.98 (0.72-1.35) | 1.03 (0.74-1.31) | 0.96 | n.s. |
| let-7e-5p   | 10 | 10 | 0.82 (0.43-3.98) | 1.03 (0.51-2.82) | 0.79 | n.s. |
| miR-29b-3p  | 10 | 10 | 1.07 (0.50-1.51) | 1.08 (0.51-1.33) | 0.98 | n.s. |

|             |    |    |                  |                  |      |      |
|-------------|----|----|------------------|------------------|------|------|
| miR-374b-5p | 10 | 10 | 1.19 (0.30-2.70) | 0.96 (0.46-2.30) | 1.23 | n.s. |
| miR-301a-3p | 10 | 10 | 0.94 (0.52-1.85) | 1.12 (0.46-1.61) | 0.83 | n.s. |
| miR-363-3p  | 10 | 10 | 1.00 (0.45-1.70) | 1.01 (0.56-1.70) | 0.98 | n.s. |
| miR-20a-5p  | 10 | 10 | 1.03 (0.68-1.34) | 1.01 (0.59-1.52) | 1.01 | n.s. |
| miR-432-5p  | 9  | 10 | 1.18 (0.12-2.34) | 1.05 (0.19-2.30) | 1.12 | n.s. |
| miR-296-5p  | 9  | 9  | 0.69 (0.10-3.45) | 0.99 (0.16-1.55) | 0.70 | n.s. |
| miR-145-5p  | 10 | 10 | 0.95 (0.50-2.36) | 0.98 (0.69-1.65) | 0.97 | n.s. |
| miR-30e-3p  | 9  | 9  | 1.07 (0.43-1.62) | 0.80 (0.43-1.75) | 1.34 | n.s. |
| miR-374a-5p | 10 | 10 | 1.11 (0.32-2.86) | 1.11 (0.17-2.44) | 0.99 | n.s. |
| miR-133a-3p | 9  | 10 | 0.89 (0.45-2.97) | 0.64 (0.13-3.23) | 1.37 | n.s. |
| miR-30b-5p  | 10 | 10 | 1.10 (0.49-2.19) | 1.03 (0.66-1.89) | 1.05 | n.s. |
| miR-188-5p  | 9  | 10 | 0.99 (0.13-3.47) | 0.89 (0.21-4.77) | 1.10 | n.s. |
| miR-16-5p   | 10 | 10 | 0.99 (0.39-1.76) | 1.08 (0.52-1.70) | 0.91 | n.s. |
| miR-485-3p  | 9  | 10 | 0.86 (0.12-4.08) | 0.94 (0.20-6.10) | 0.91 | n.s. |
| miR-136-5p  | 10 | 10 | 1.19 (0.05-3.41) | 1.03 (0.38-5.90) | 1.15 | n.s. |
| miR-127-3p  | 10 | 10 | 1.44 (0.23-2.97) | 1.11 (0.16-2.57) | 1.29 | n.s. |
| miR-584-5p  | 10 | 10 | 1.04 (0.27-2.12) | 1.07 (0.59-1.76) | 0.96 | n.s. |
| miR-221-3p  | 10 | 10 | 1.04 (0.69-1.25) | 0.88 (0.73-1.80) | 1.18 | n.s. |
| miR-23b-3p  | 10 | 10 | 0.99 (0.78-1.47) | 0.95 (0.71-1.47) | 1.04 | n.s. |
| miR-532-5p  | 10 | 10 | 1.12 (0.43-2.18) | 0.92 (0.52-1.94) | 1.22 | n.s. |
| miR-32-5p   | 10 | 10 | 1.16 (0.22-2.14) | 1.05 (0.53-1.58) | 1.10 | n.s. |
| miR-24-3p   | 10 | 10 | 1.01 (0.83-1.28) | 0.95 (0.61-1.57) | 1.05 | n.s. |
| miR-574-3p  | 9  | 9  | 0.79 (0.65-1.01) | 0.76 (0.40-1.43) | 1.03 | n.s. |
| miR-365a-3p | 9  | 9  | 0.84 (0.44-1.62) | 0.87 (0.24-2.98) | 0.96 | n.s. |
| miR-140-5p  | 10 | 10 | 1.05 (0.59-1.35) | 0.97 (0.73-1.43) | 1.07 | n.s. |
| miR-328-3p  | 9  | 10 | 0.84 (0.63-1.38) | 0.82 (0.51-1.26) | 1.01 | n.s. |
| miR-26a-5p  | 10 | 10 | 0.94 (0.70-1.66) | 1.01 (0.75-1.93) | 0.93 | n.s. |
| miR-154-5p  | 10 | 10 | 1.21 (0.54-2.81) | 0.77 (0.19-3.98) | 1.56 | n.s. |
| miR-151a-5p | 10 | 10 | 0.89 (0.76-1.32) | 0.96 (0.70-1.47) | 0.93 | n.s. |
| miR-342-3p  | 10 | 10 | 1.01 (0.51-1.75) | 1.09 (0.47-1.62) | 0.92 | n.s. |
| miR-185-5p  | 10 | 10 | 1.02 (0.55-1.63) | 1.10 (0.50-1.49) | 0.93 | n.s. |
| miR-126-3p  | 10 | 10 | 1.08 (0.53-1.55) | 1.04 (0.69-1.52) | 1.03 | n.s. |
| miR-140-3p  | 10 | 10 | 1.01 (0.41-1.72) | 1.15 (0.63-1.44) | 0.87 | n.s. |
| miR-29c-3p  | 10 | 10 | 1.02 (0.66-1.38) | 0.98 (0.64-1.42) | 1.04 | n.s. |
| miR-10b-5p  | 10 | 10 | 1.02 (0.52-1.77) | 1.08 (0.32-2.14) | 0.94 | n.s. |
| miR-874-3p  | 9  | 10 | 0.78 (0.47-1.98) | 0.94 (0.48-1.89) | 0.83 | n.s. |
| miR-423-3p  | 10 | 10 | 1.06 (0.51-1.54) | 0.96 (0.71-1.54) | 1.10 | n.s. |
| miR-410-3p  | 9  | 10 | 0.92 (0.29-2.60) | 1.04 (0.12-2.78) | 0.88 | n.s. |
| miR-126-5p  | 10 | 10 | 1.04 (0.72-1.82) | 1.06 (0.21-1.52) | 0.98 | n.s. |

|             |    |    |                  |                  |      |      |
|-------------|----|----|------------------|------------------|------|------|
| miR-182-5p  | 9  | 10 | 0.94 (0.30-3.07) | 0.82 (0.22-3.91) | 1.13 | n.s. |
| miR-320a    | 10 | 10 | 0.88 (0.59-1.85) | 1.05 (0.59-1.60) | 0.84 | n.s. |
| miR-431-5p  | 9  | 10 | 1.14 (0.30-2.26) | 0.91 (0.15-2.99) | 1.25 | n.s. |
| miR-451a    | 10 | 10 | 1.04 (0.36-1.72) | 1.05 (0.46-1.99) | 0.98 | n.s. |
| miR-148b-3p | 10 | 10 | 1.01 (0.54-1.38) | 0.99 (0.74-1.25) | 1.02 | n.s. |
| miR-744-5p  | 10 | 10 | 1.03 (0.26-1.92) | 1.09 (0.66-1.53) | 0.94 | n.s. |
| miR-652-3p  | 10 | 10 | 0.99 (0.81-1.22) | 0.98 (0.72-1.37) | 1.01 | n.s. |
| miR-22-3p   | 10 | 9  | 1.07 (0.79-1.31) | 1.05 (0.83-1.34) | 1.02 | n.s. |
| miR-34a-5p  | 10 | 10 | 1.02 (0.36-2.99) | 1.05 (0.30-4.72) | 0.96 | n.s. |
| miR-339-5p  | 10 | 10 | 1.41 (0.21-2.11) | 1.02 (0.56-2.57) | 1.37 | n.s. |
| miR-93-5p   | 10 | 10 | 1.00 (0.60-1.52) | 1.05 (0.53-1.55) | 0.96 | n.s. |
| miR-103a-3p | 10 | 10 | 1.12 (0.59-1.28) | 0.96 (0.81-1.24) | 1.16 | n.s. |
| let-7d-3p   | 10 | 10 | 1.04 (0.68-1.35) | 0.98 (0.85-1.30) | 1.05 | n.s. |
| miR-128-3p  | 10 | 10 | 1.02 (0.64-1.59) | 1.12 (0.48-1.28) | 0.90 | n.s. |
| miR-421     | 9  | 10 | 0.82 (0.73-1.25) | 0.80 (0.61-1.29) | 1.02 | n.s. |
| miR-329-3p  | 10 | 10 | 0.94 (0.25-2.67) | 0.76 (0.31-4.22) | 1.23 | n.s. |

$N_{AD}$  number of Alzheimer patients in which the miRNA was detected,  $N_{control}$  number of control patients in which the miRNA was detected,  $M_{AD}$  the median of relative expression levels among Alzheimer patients,  $M_{control}$  median of relative expression levels among control patients,  $FC$  fold change of median values,  $p$  p-values of difference calculated by two-sided nonparametric Mann-Whitney test (not corrected for multiple testing), *n.s.* nonsignificant ( $p > 0.05$ )
