# Supplementary material for: miRNA expression profiles in cerebrospinal fluid and blood of patients with Alzheimer’s disease and other types of dementia – an exploratory study
Source: Springer Nature journal article supplement (doi:10.1186/s40035-016-0053-5), 2016-03-15

LOO classification accuracy

1.0  
0.8  
0.6  
0.5  
0.4  
0.3  
0.2  
0.1  
0.0

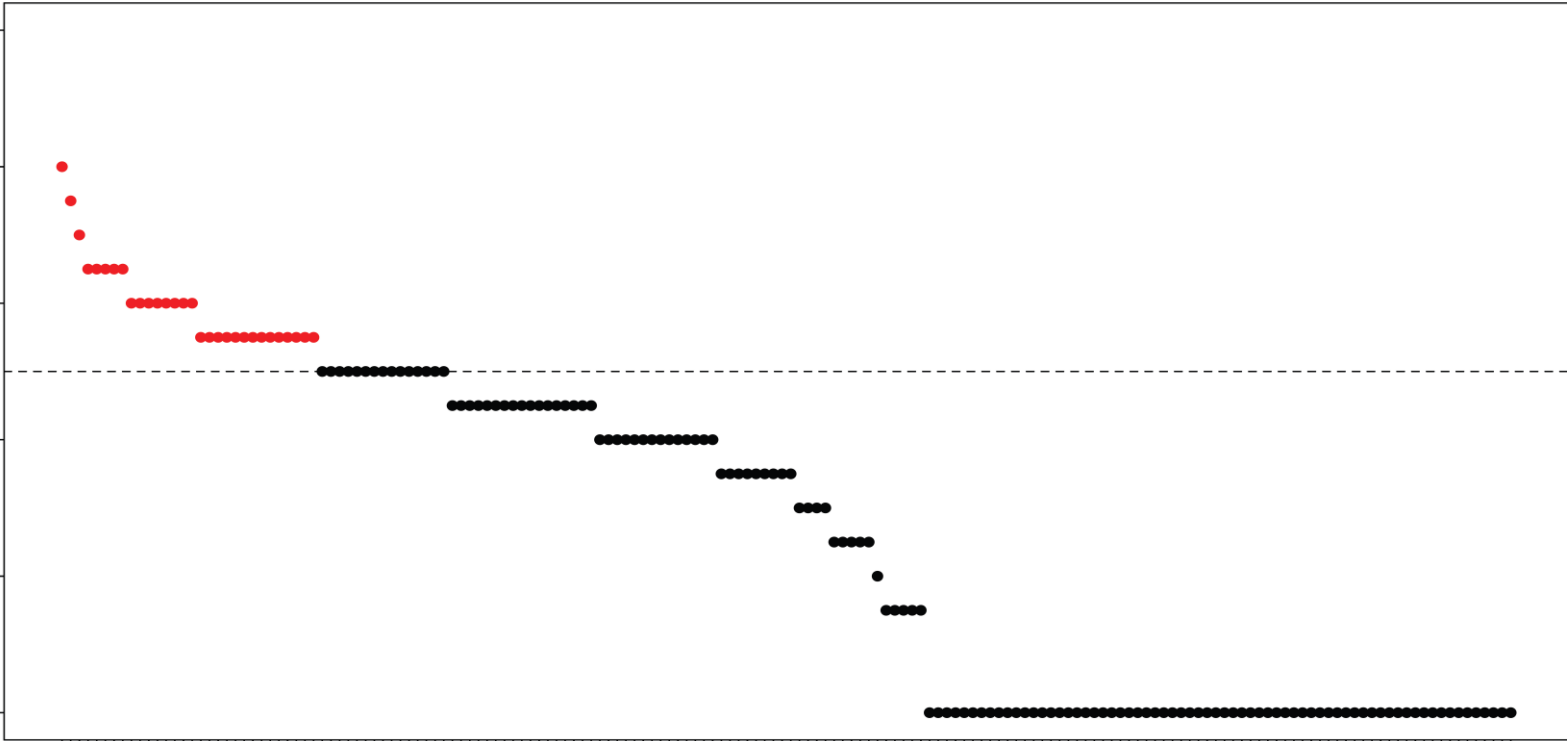

Supplement: MOESM2 [file 9788558]
