# Supplementary material for: miRNA expression profiles in cerebrospinal fluid and blood of patients with Alzheimer’s disease and other types of dementia – an exploratory study
Source: Springer Nature journal article supplement (doi:10.1186/s40035-016-0053-5), 2016-03-15
Supplement: MOESM3 [file 9788558]

**Additional file 3.** Estimation of the blood brain barrier dysfunction in patients with dementia based on albumin CSF/serum concentration quotients

| Patient | Diagnosis | Gender | Age | $Q_{alb}$ | $Q_{alb\ limit}$ | BBB    |
|---------|-----------|--------|-----|-----------|------------------|--------|
| 1       | AD        | F      | 66  | 8.5       | 8.4              | Leaky  |
| 2       | AD        | M      | 58  | 19.1      | 7.9              | Leaky  |
| 3       | AD        | F      | 56  | 4.5       | 7.7              | Normal |
| 4       | AD        | M      | 59  | 9.1       | 7.9              | Leaky  |
| 5       | AD        | F      | 84  | 8.8       | 9.6              | Normal |
| 6       | AD        | F      | 82  | 6.9       | 9.5              | Normal |
| 7       | AD        | M      | 78  | 13.2      | 9.2              | Leaky  |
| 8       | AD        | F      | 70  | 6         | 8.7              | Normal |
| 9       | AD        | F      | 72  | 3.5       | 8.8              | Normal |
| 10      | AD        | M      | 75  | 6         | 9.0              | Normal |
| 11      | DLB       | M      | 64  | 6.7       | 8.3              | Normal |
| 12      | VAD       | M      | 79  | 17.3      | 9.3              | Leaky  |
| 13      | FTD       | F      | 54  | 10.8      | 7.6              | Leaky  |
| 14      | FTD       | M      | 77  | 9.1       | 9.1              | Normal |
| 15      | VAD       | F      | 79  | 5.9       | 9.3              | Normal |
| 16      | FTD       | M      | 79  | 10        | 9.3              | Leaky  |
| 17      | DLB       | F      | 68  | 3.1       | 8.5              | Normal |
| 18      | VAD       | M      | 74  | 7.2       | 8.9              | Normal |
| 19      | VAD       | M      | 59  | 6.2       | 7.9              | Normal |
| 20      | FTD       | F      | 61  | 5.1       | 8.1              | Normal |

*AD* Alzheimer's disease, *DLB* dementia with Lewy bodies, *VAD* vascular dementia, *FTD* frontotemporal dementia.  $Q_{alb}$  albumin CSF/serum concentration quotient.  $Q_{alb\ limit}$  age dependent upper limit of albumin CSF/serum concentration quotient calculated by the formula  $Q_{alb} = (4 + \frac{age}{15})$ . *BBB* blood brain barrier
